# Supplementary material
Source: PubMed Central journal article supplement (PMC1955824)

**A**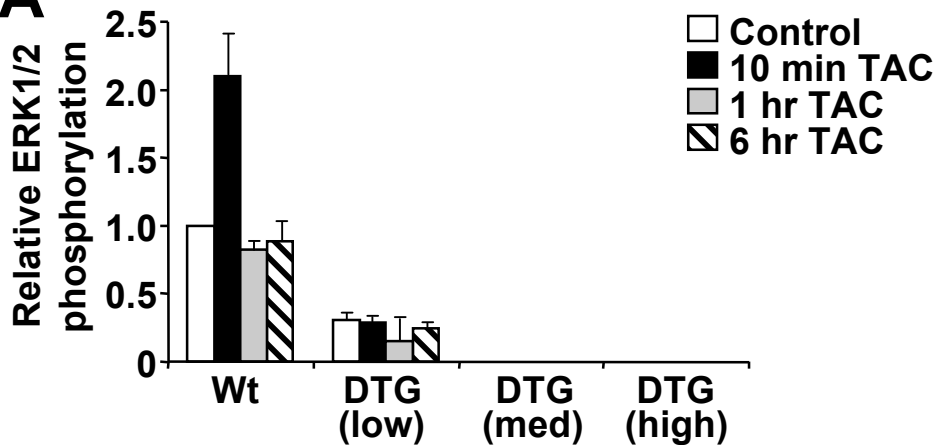**B**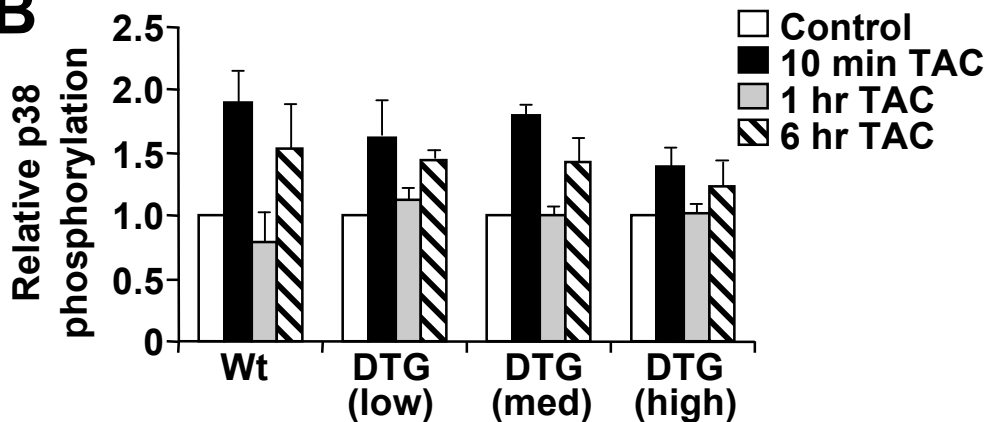**C**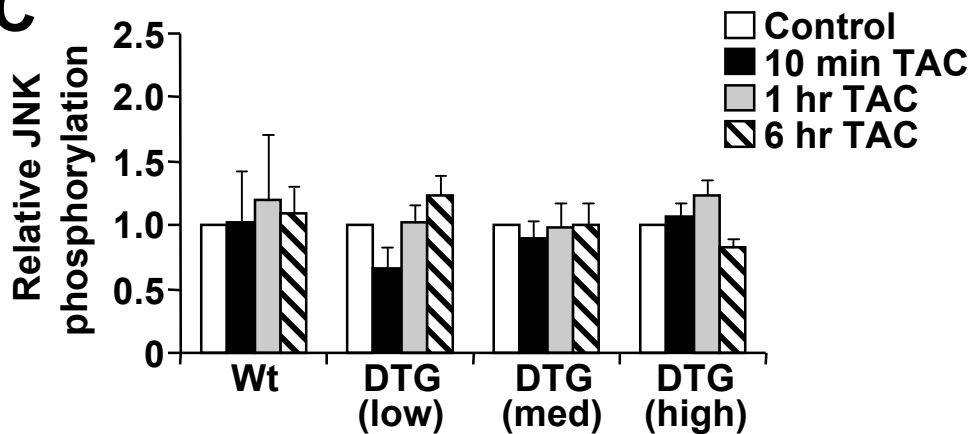

Supplement: pnas_0610906104_1.pdf [file pnas_0610906104_1.pdf]

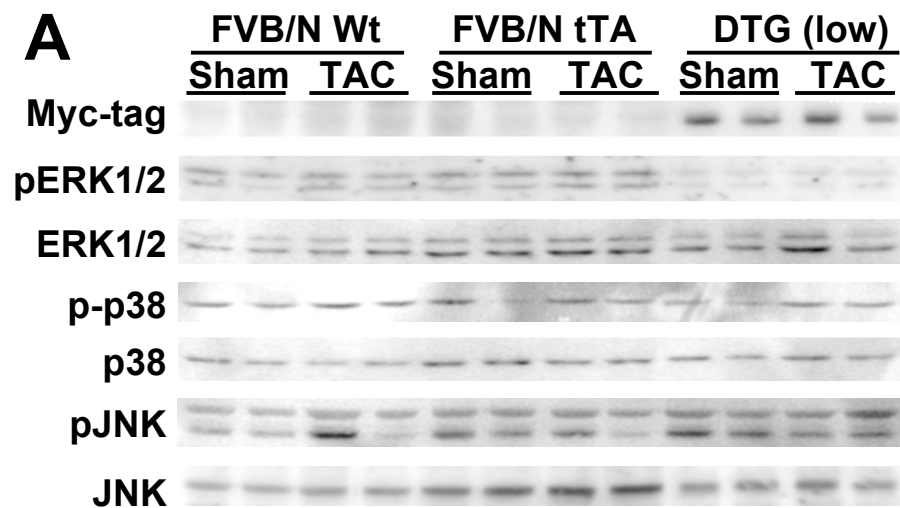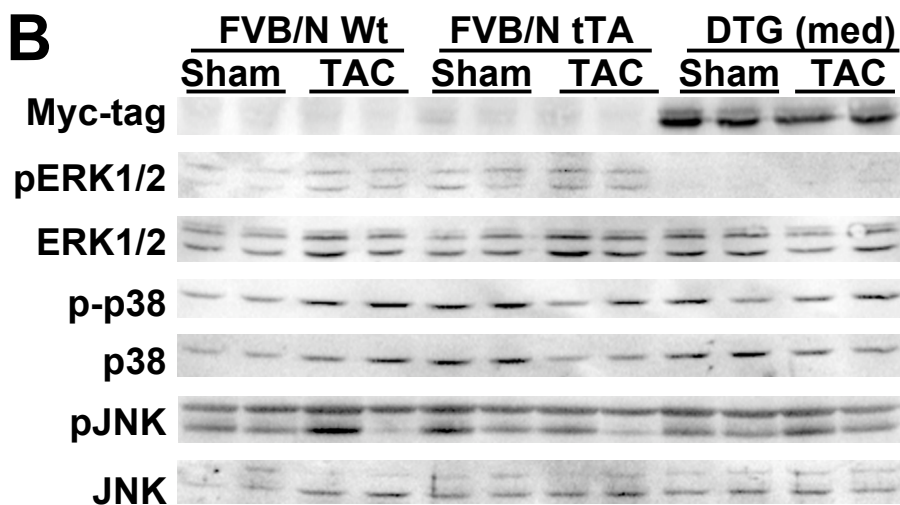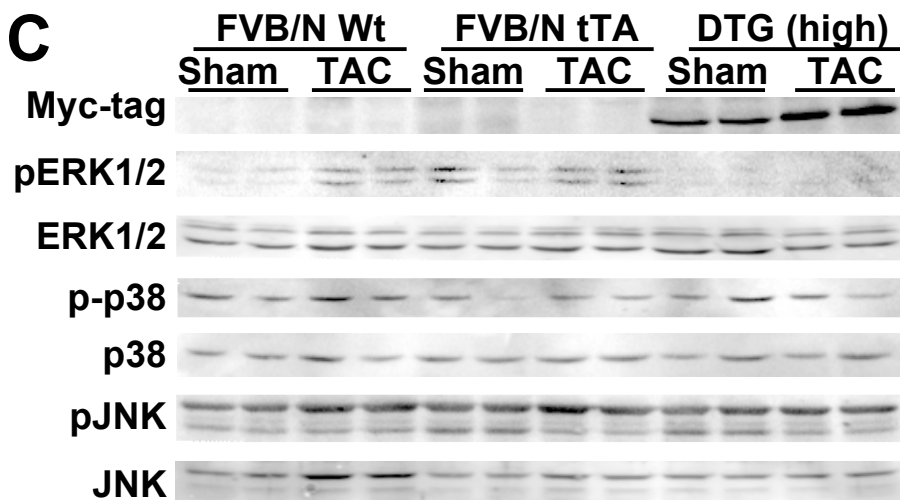

Supplement: pnas_0610906104_2.pdf [file pnas_0610906104_2.pdf]

**+Dox**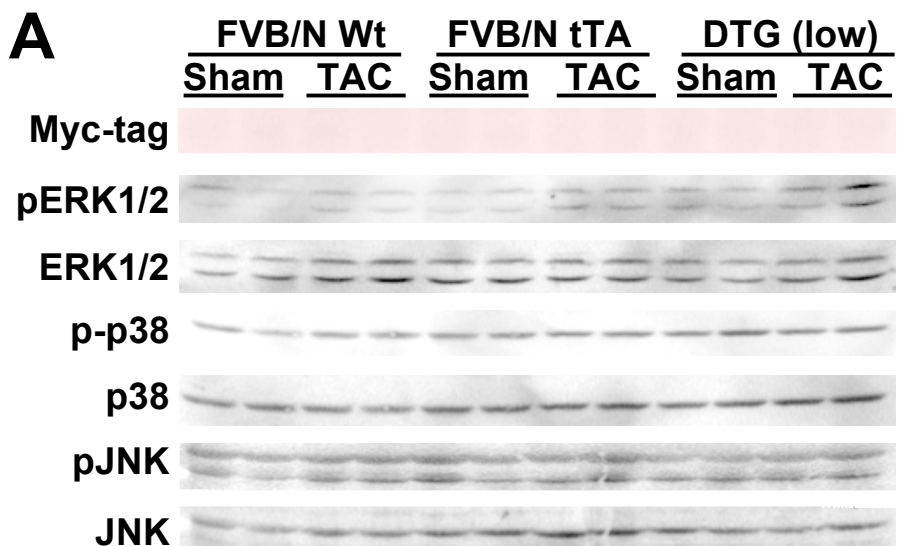**+Dox**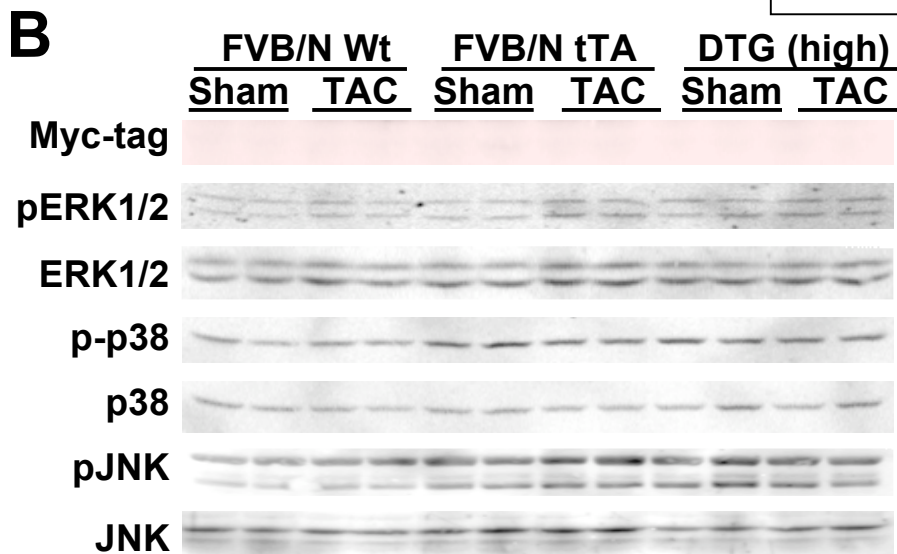

Supplement: pnas_0610906104_3.pdf [file pnas_0610906104_3.pdf]

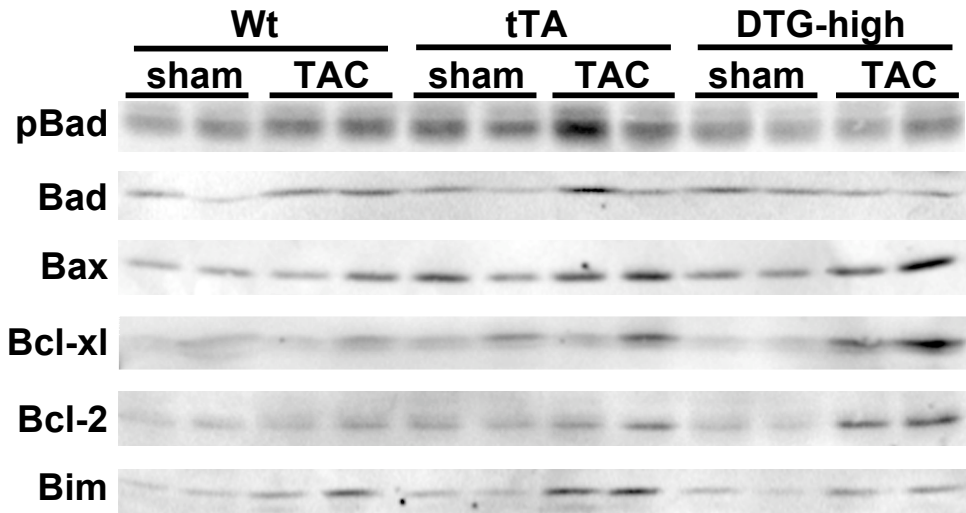

Supplement: pnas_0610906104_4.pdf [file pnas_0610906104_4.pdf]
